# Supplementary material
Source: MDPI journal article supplement (https://www.mdpi.com/2312-7481/10/5/33)
Supplement: s1 [file s1]

Article

# Preparation of Magnetic Nano-catalyst Containing Schiff Base Unit and Its Application in the Chemical Fixation of CO<sub>2</sub> into Cyclic Carbonates

Na Kang<sup>1</sup>, Yindi Fan<sup>1,2</sup>, Dan Li<sup>1</sup>, Xiaoli Jia<sup>1</sup>, and Sanhu Zhao<sup>1,2,\*</sup>

<sup>a</sup>Department of Chemistry, Xinzhou Normal University, Xinzhou 034000, Shanxi, China

<sup>b</sup>School of Chemistry and Material Science, Shanxi Normal University, Taiyuan 030000, Shanxi, China;

Corresponding author. e-mail: sanhuzhao@163.com

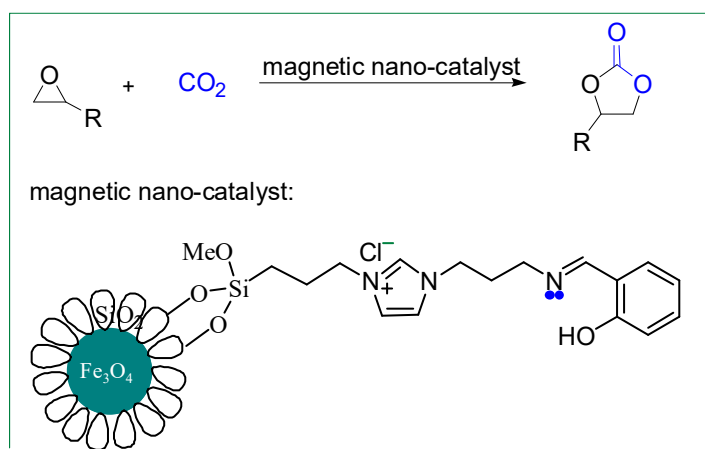

**NMR spectra of ionic liquids and cyclic carbamate.**

**Figure S1: NMR spectrum of 1-butyl-3-methylimidazolium chloride ([Bmim]Cl)**

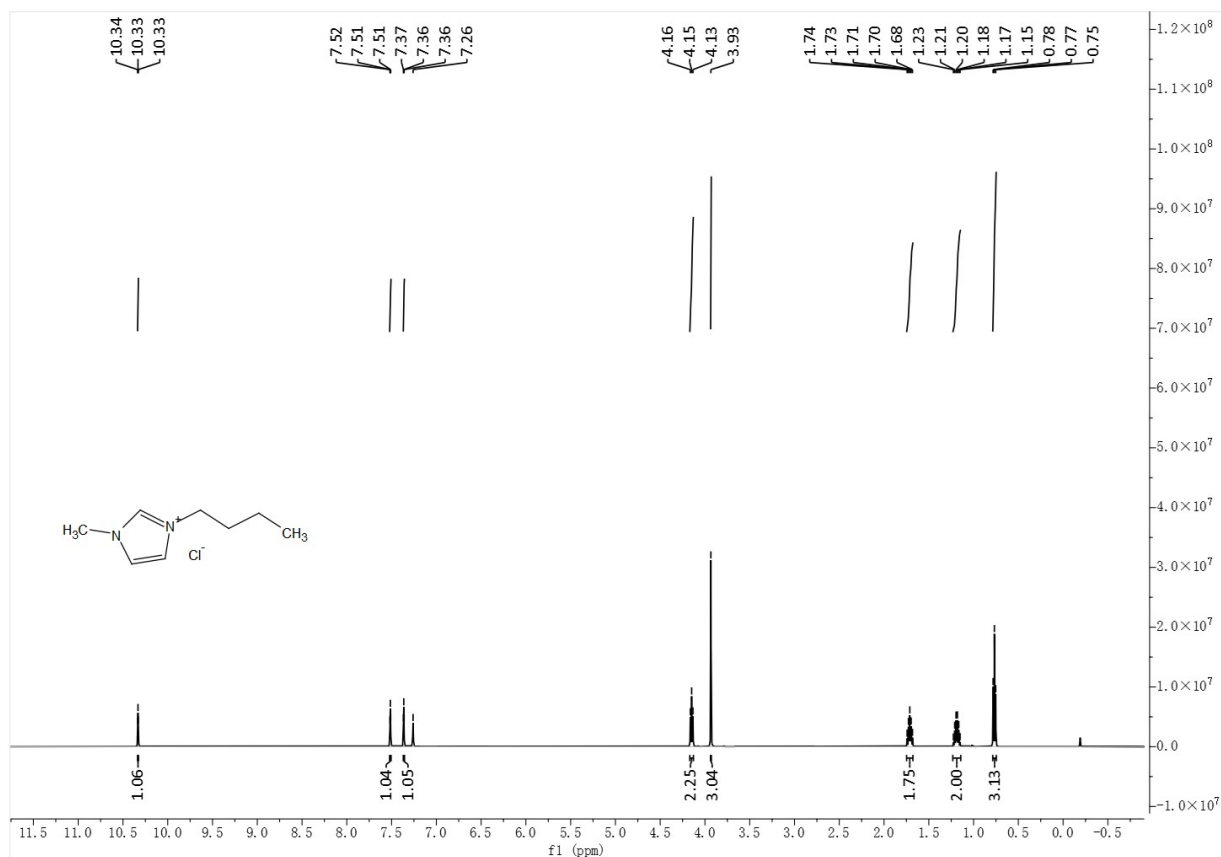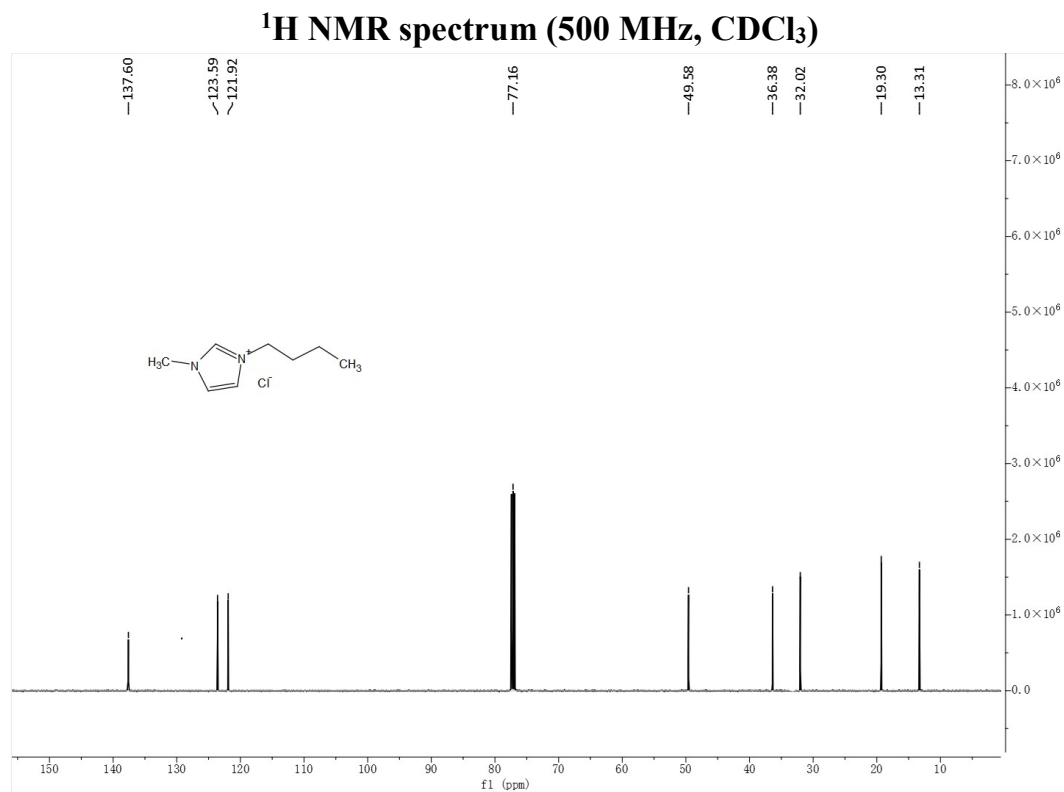

**Figure S2: NMR spectrum of the Schiff base containing imidazole ring**

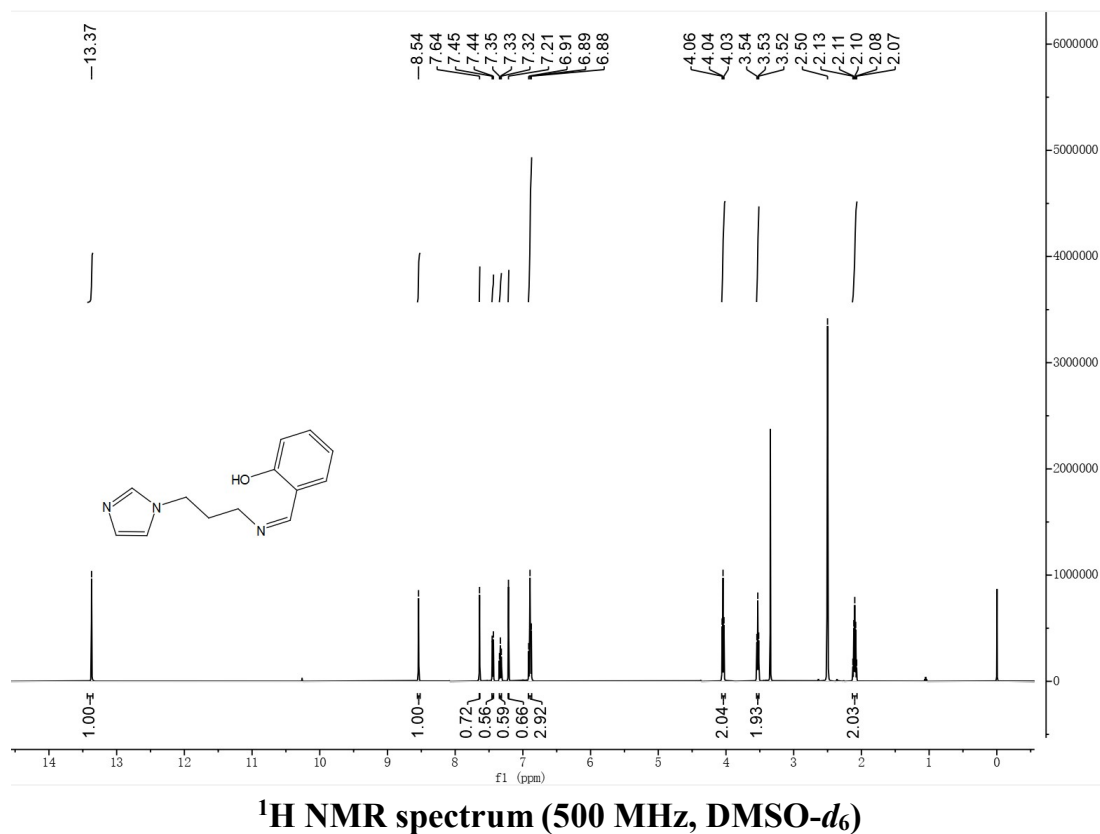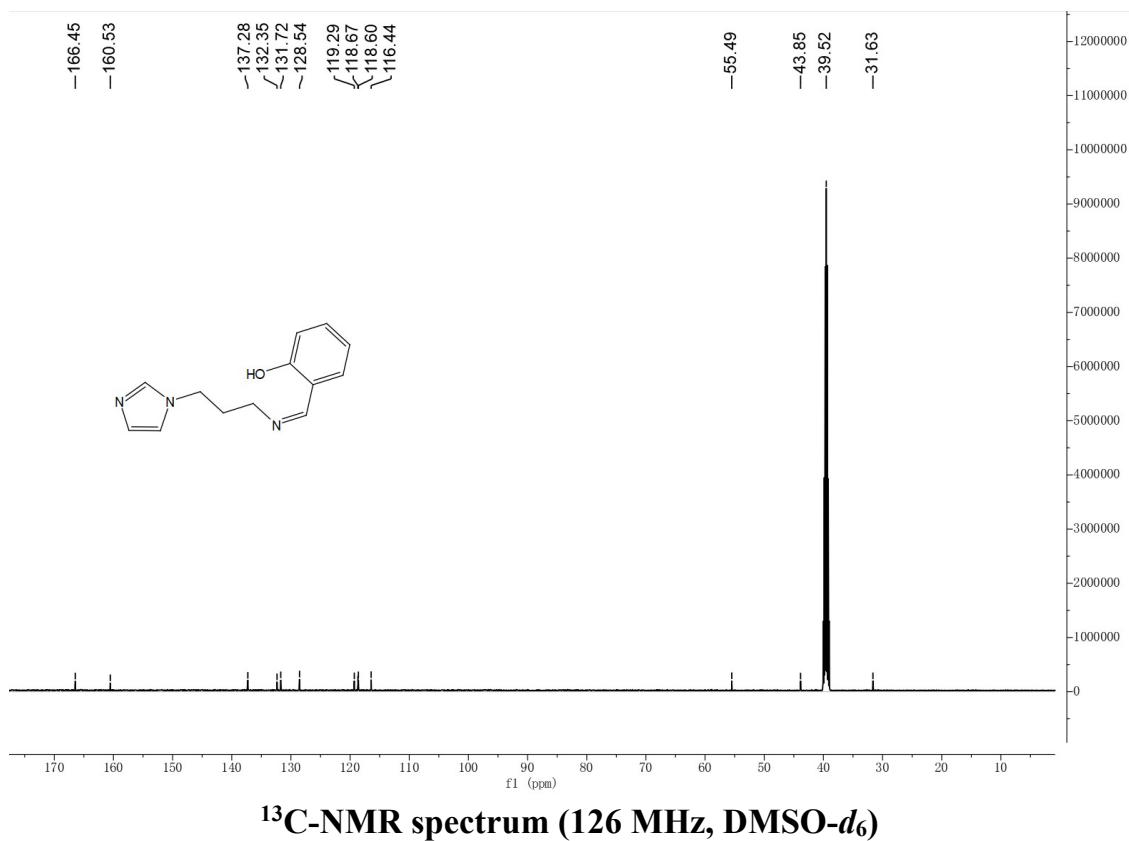

**Figure S3: NMR spectrum of the ionic liquid containing Schiff base unit**

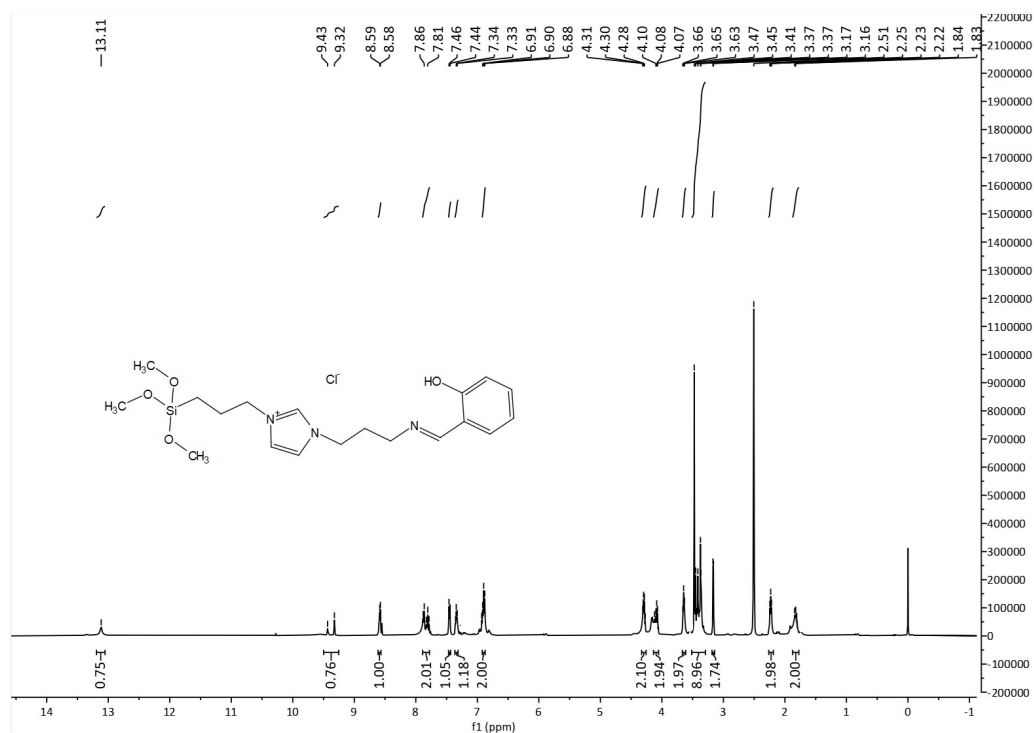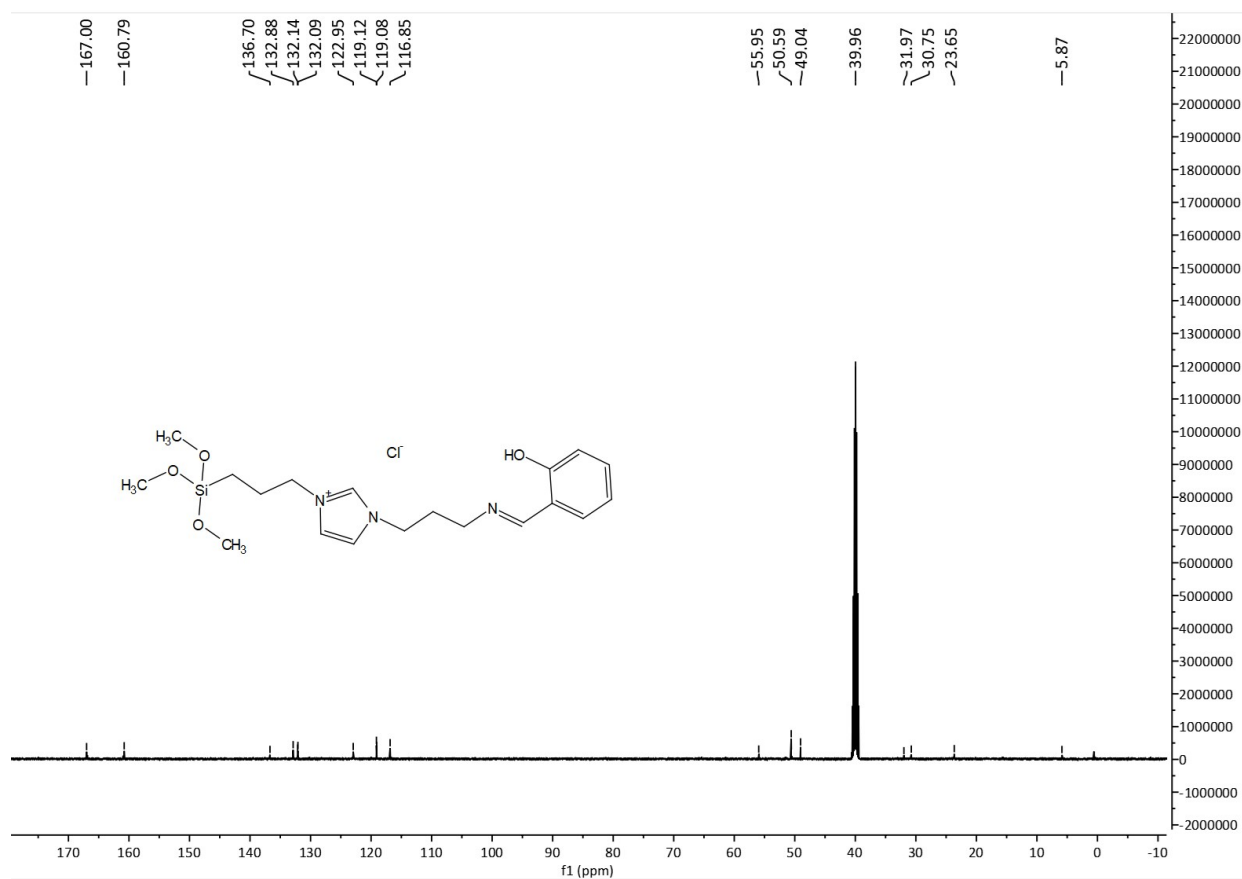

**Figure S4: NMR spectrum of a mixture of ionic liquid containing Schiff base unit and epichlorohydrin**

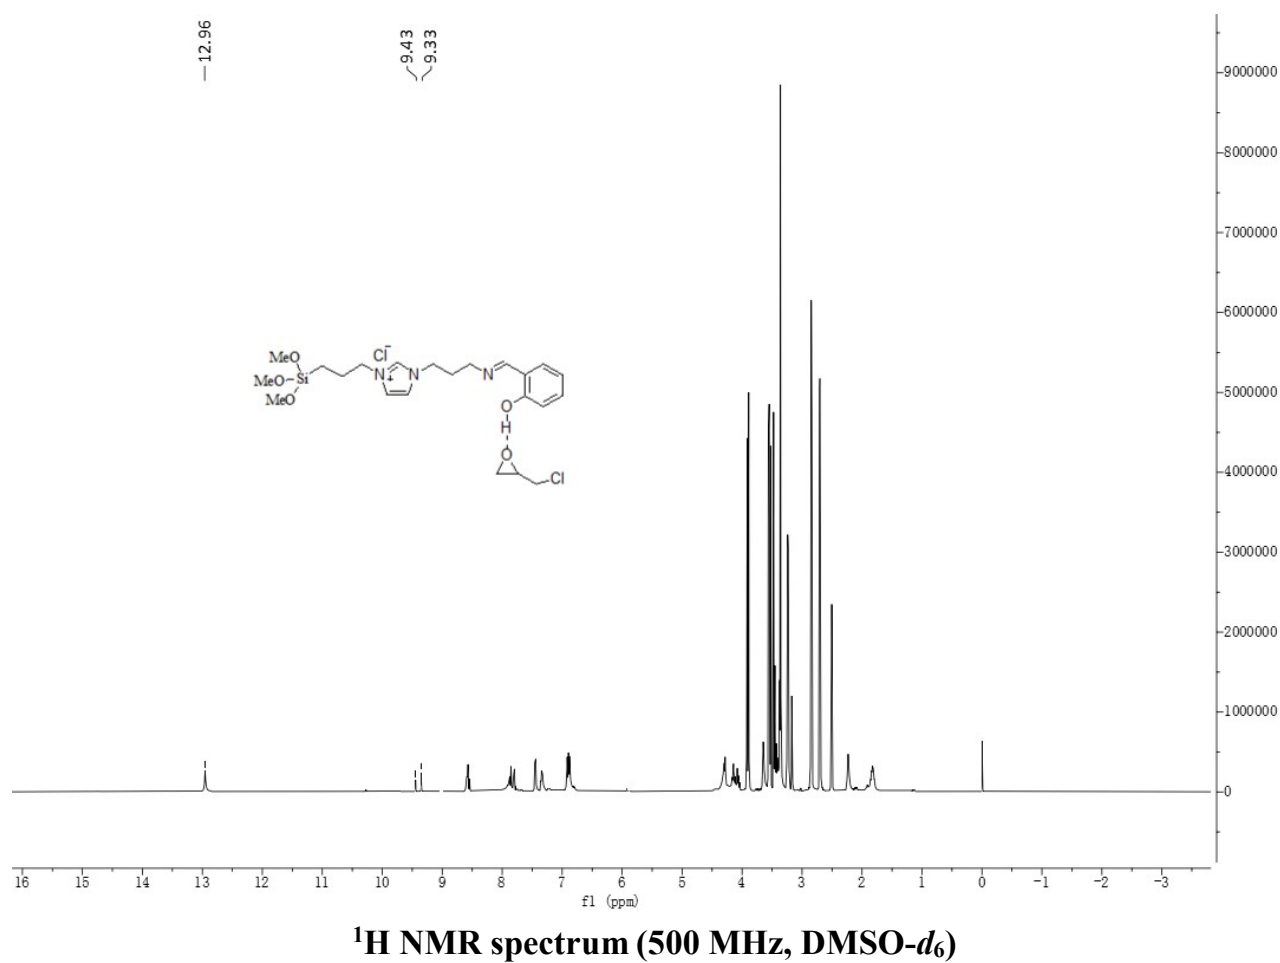

**Figure S5: NMR spectrum of 4-methyl-[1,3]dioxolan-2-one**

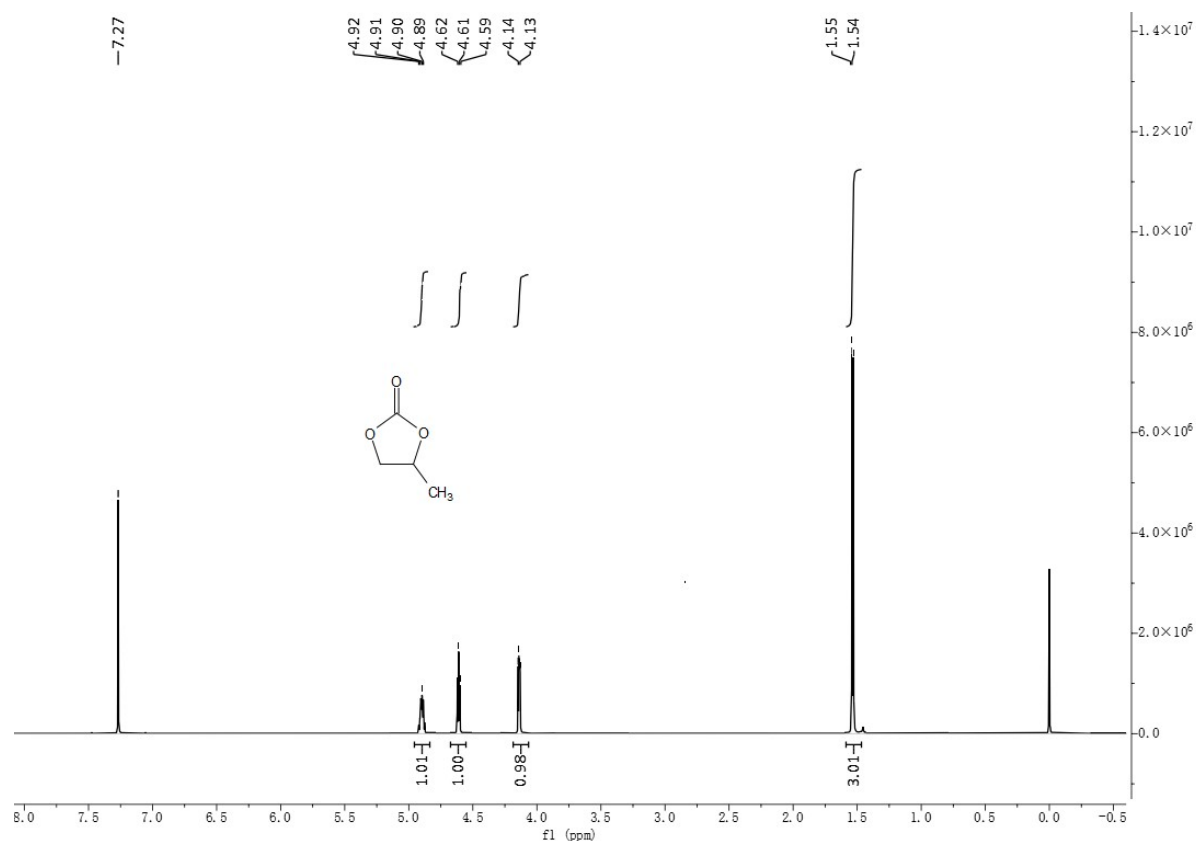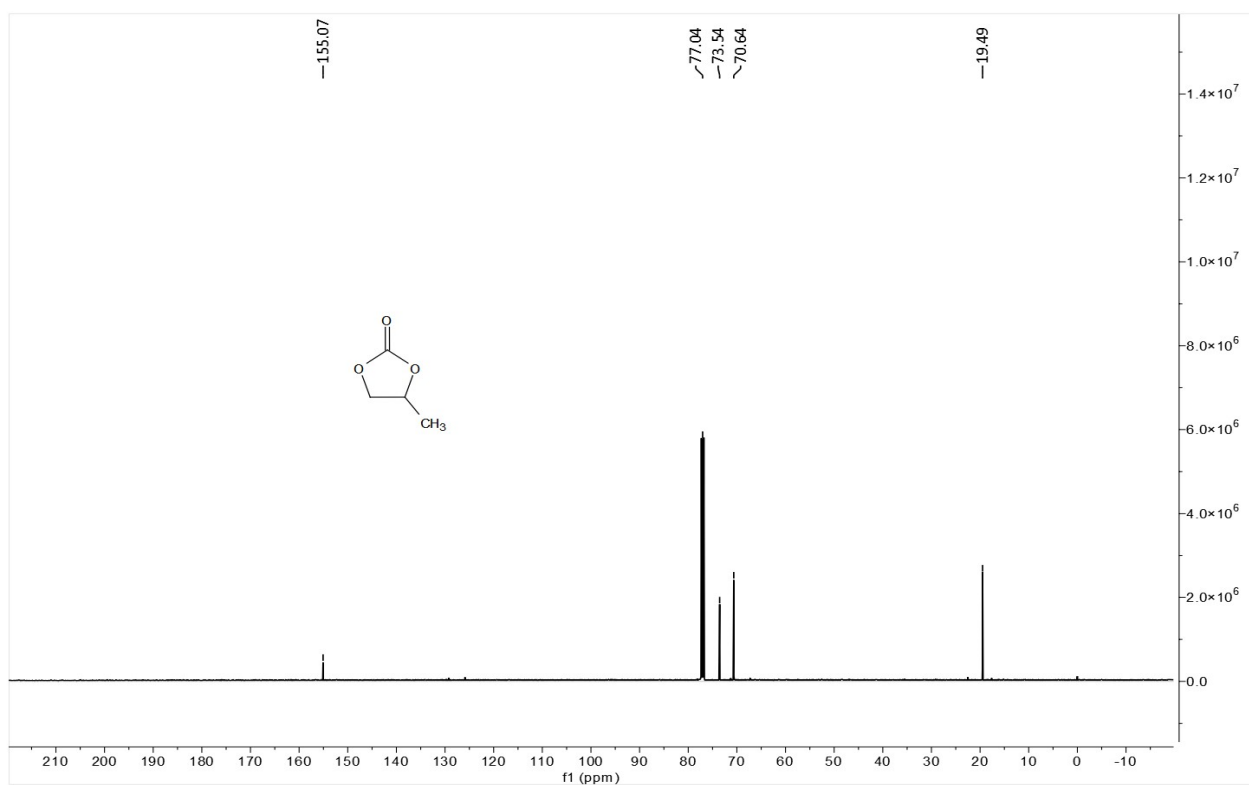

**Figure S6: NMR spectrum of 4-butyl-[1,3]dioxolan-2-one**

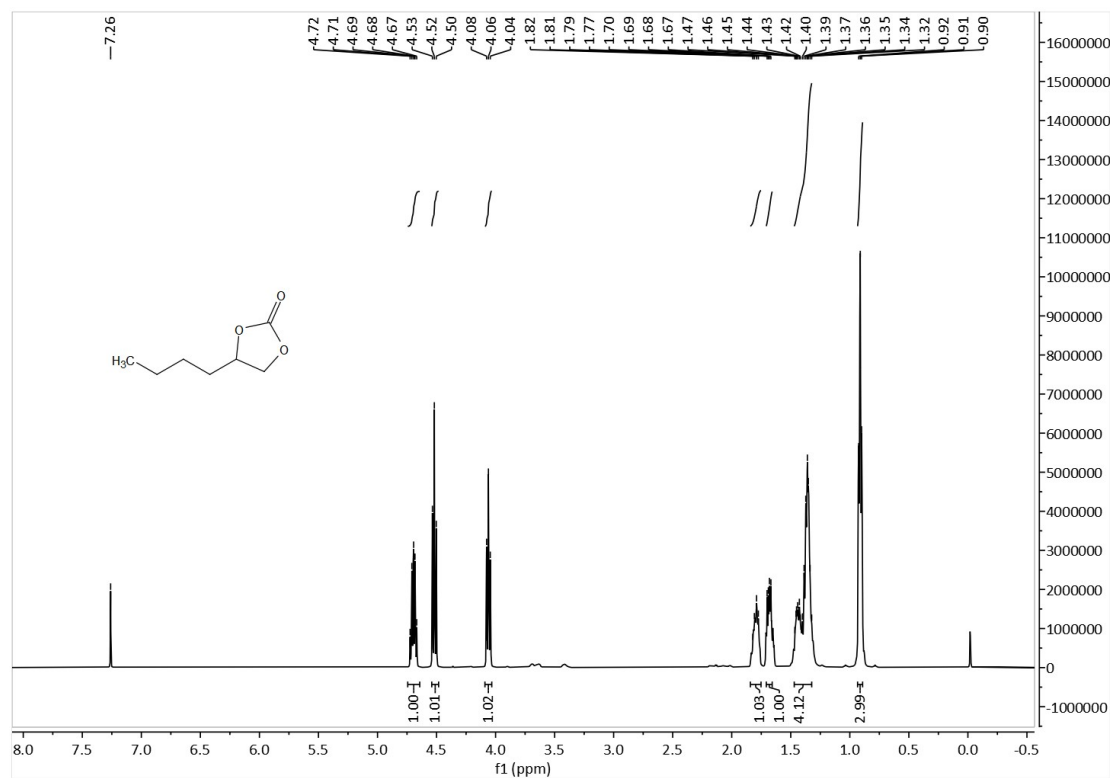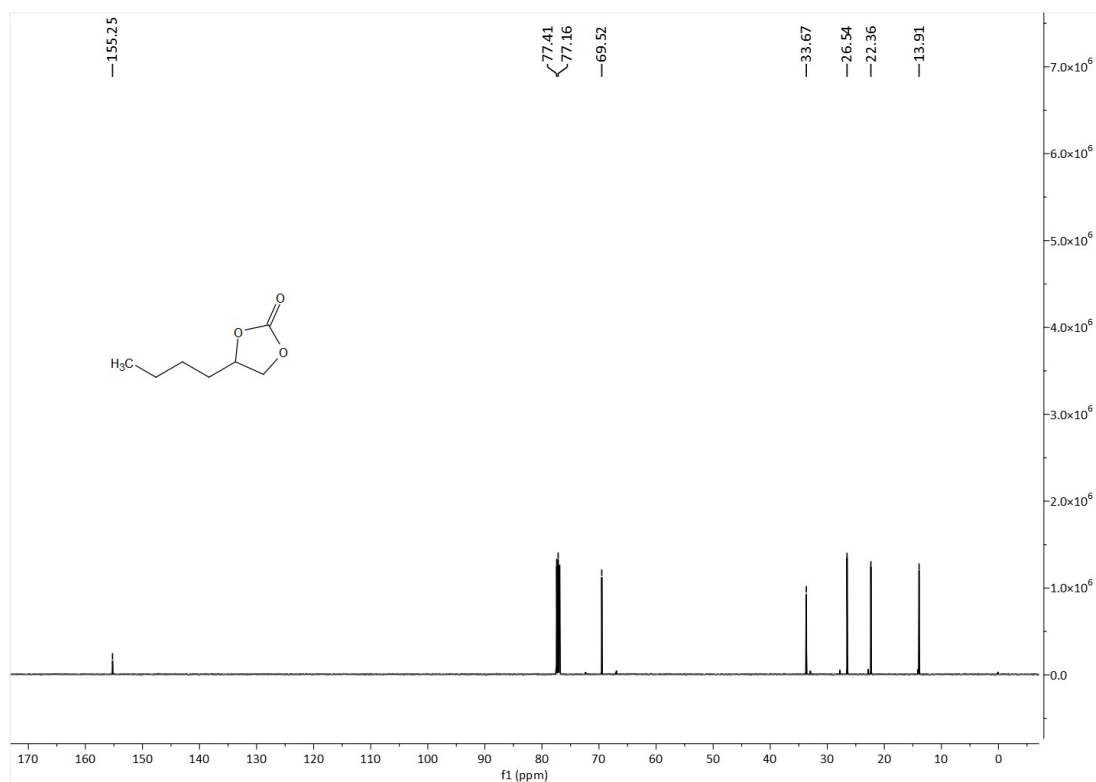

**Figure S7: NMR spectrum of 4-chloromethyl-[1,3]dioxolan-2-one**

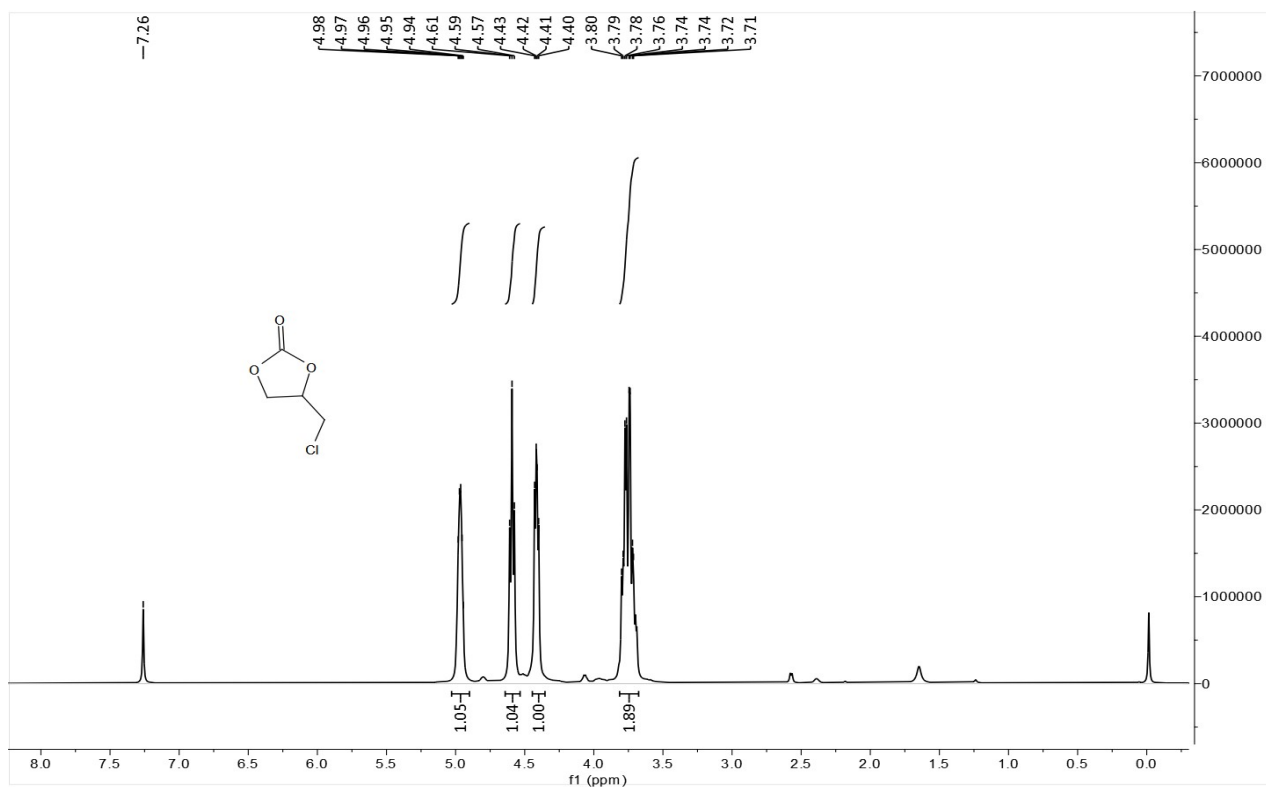

**<sup>1</sup>H NMR spectrum (500 MHz, CDCl<sub>3</sub>)**

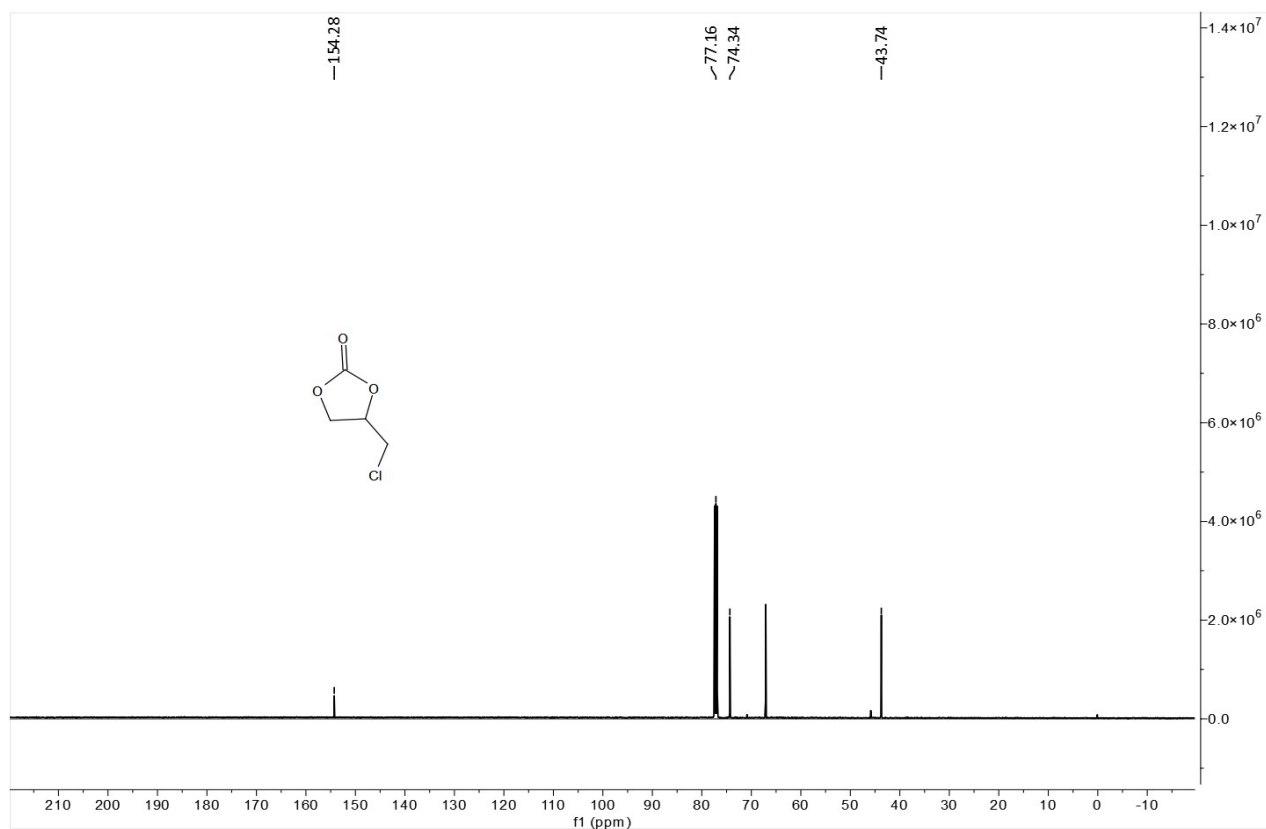

**<sup>13</sup>C-NMR spectrum (126 MHz, CDCl<sub>3</sub>)**



**Figure S8: NMR spectrum of hexahydro-benzo[1,3]dioxol-2-one**

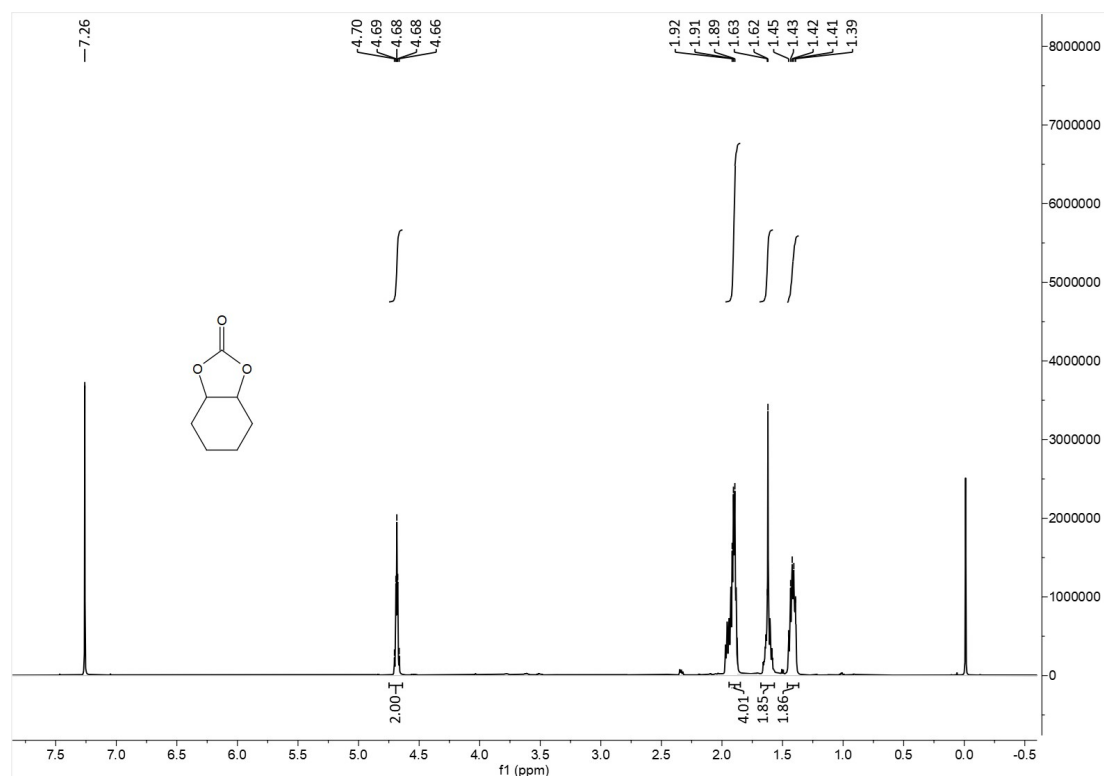

**<sup>1</sup>H NMR spectrum (500 MHz, CDCl<sub>3</sub>)**

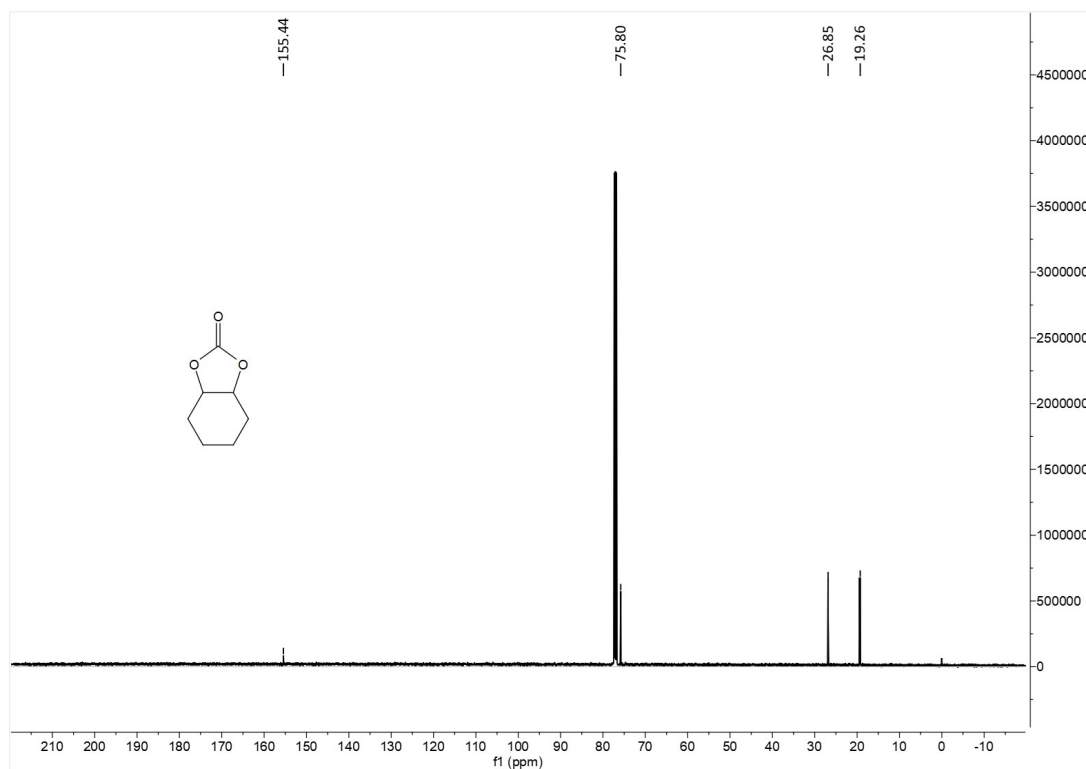

**<sup>13</sup>C-NMR spectrum (126 MHz, CDCl<sub>3</sub>)**

**Figure S9: NMR spectrum of 4-phenyl-[1,3]dioxolan-2-one**

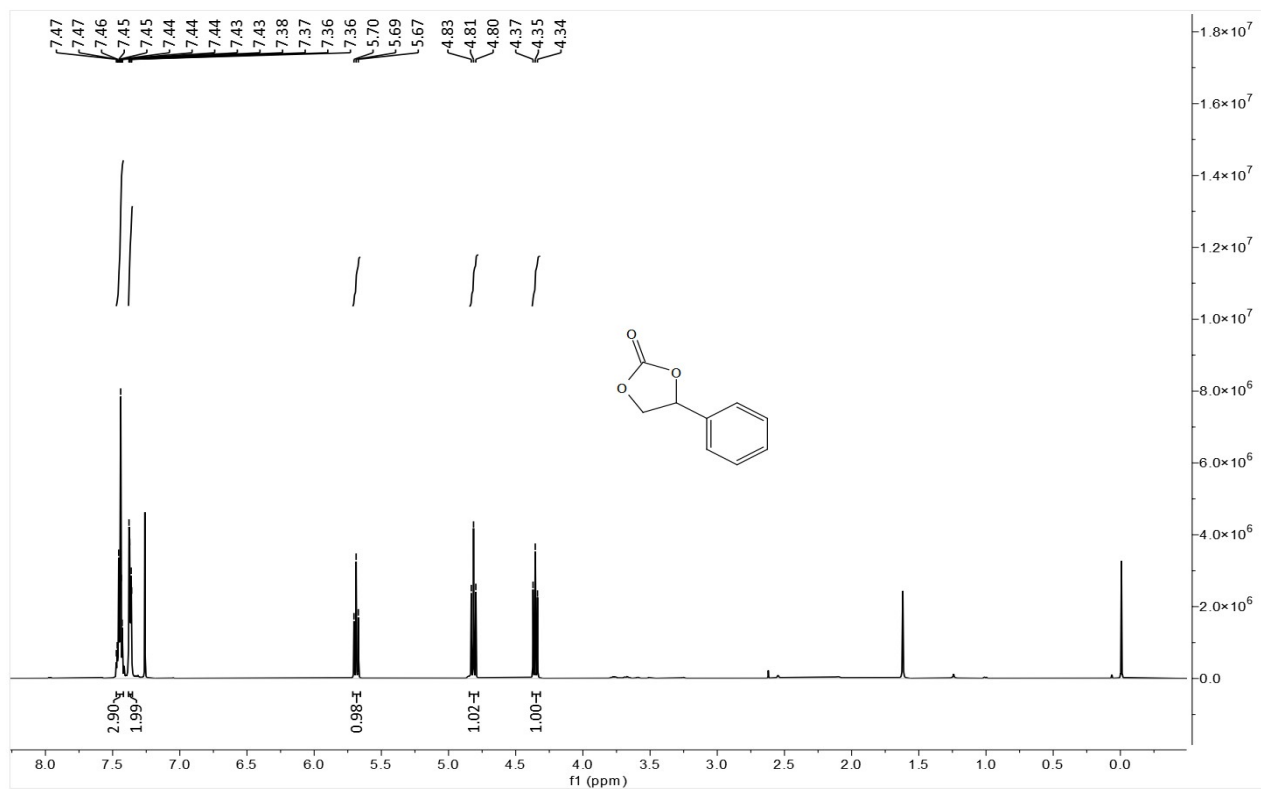

**<sup>1</sup>H NMR spectrum (500 MHz, CDCl<sub>3</sub>)**

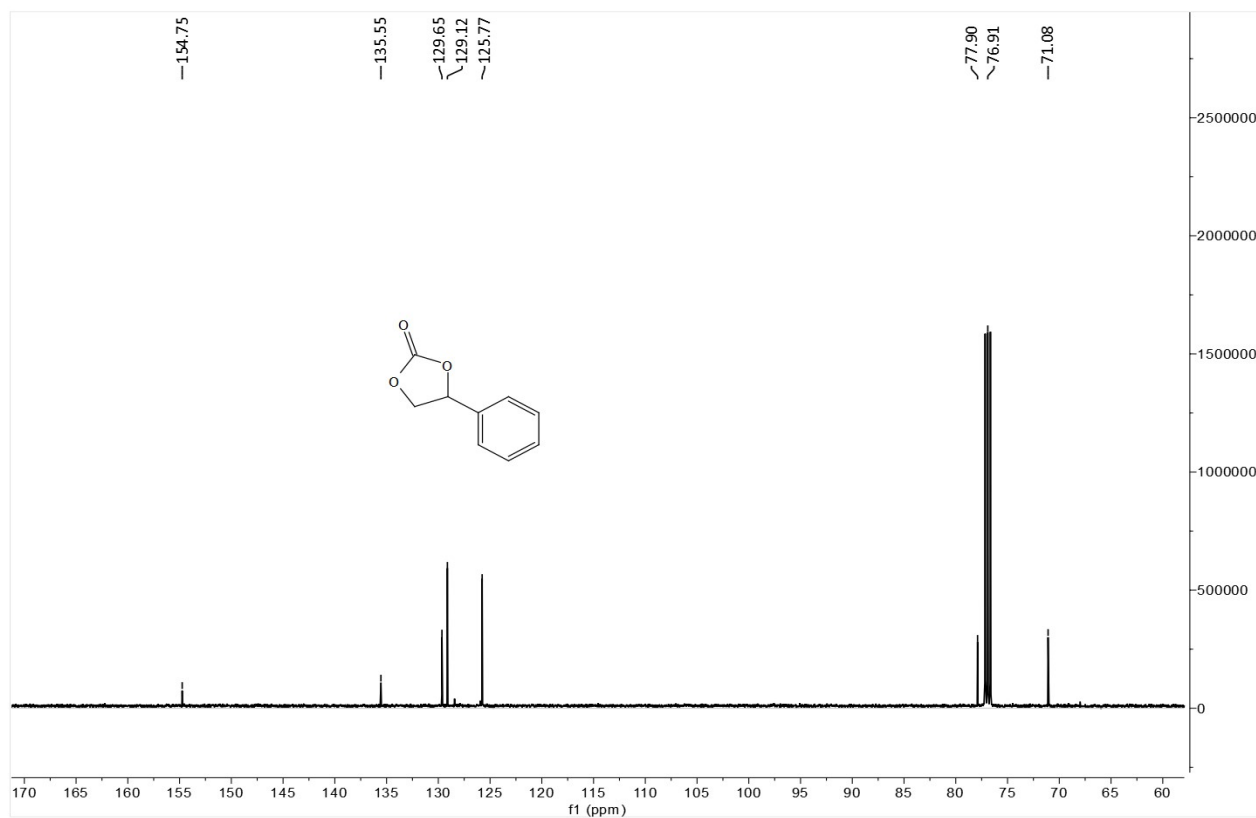

**<sup>13</sup>C-NMR spectrum (126 MHz, CDCl<sub>3</sub>)**
