# Supplementary material
Source: MDPI journal article supplement (https://www.mdpi.com/2312-7481/10/5/33)
Supplement: s1 [file s1]

---

## Supplementary Information

# Preparation of Magnetic Nano-Catalyst Containing Schiff Base Unit and Its Application in the Chemical Fixation of CO<sub>2</sub> into Cyclic Carbonates

Na Kang <sup>1</sup>, Yindi Fan <sup>1,2</sup>, Dan Li <sup>1</sup>, Xiaoli Jia <sup>1</sup> and Sanhu Zhao <sup>1,2,\*</sup>

<sup>1</sup> Department of Chemistry, Xinzhou Normal University, Xinzhou 034000, China

<sup>2</sup> School Chemistry and Material Science, Shanxi Normal University, Taiyuan 030000, China

\* Correspondence: sanhuzhao@163.com or sanhuzhao@xztnu.edu.cn

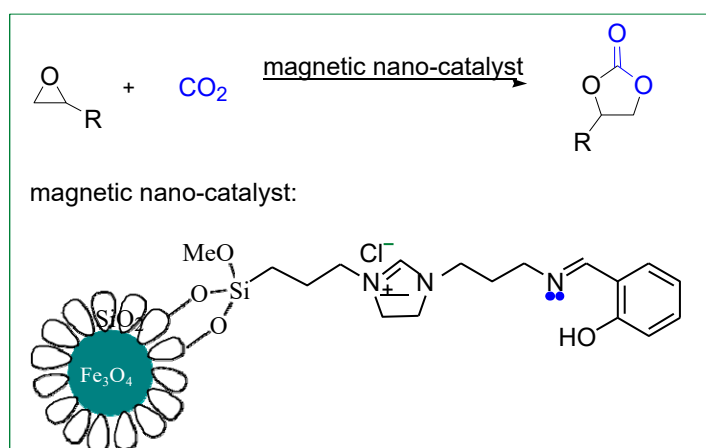

**NMR spectra of ionic liquids and cyclic carbamate.**

**Figure S1. NMR spectrum of 1-butyl-3-methylimidazolium chloride ([Bmim]Cl)**

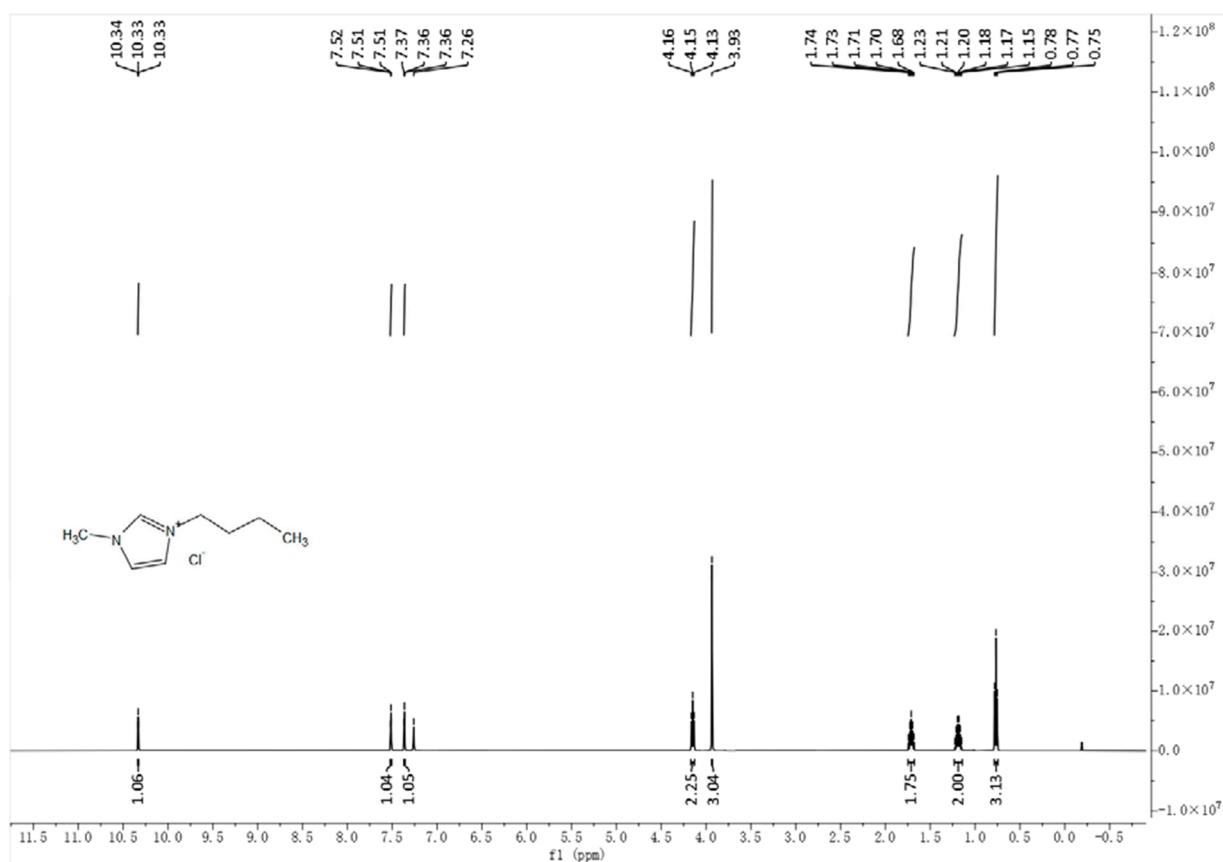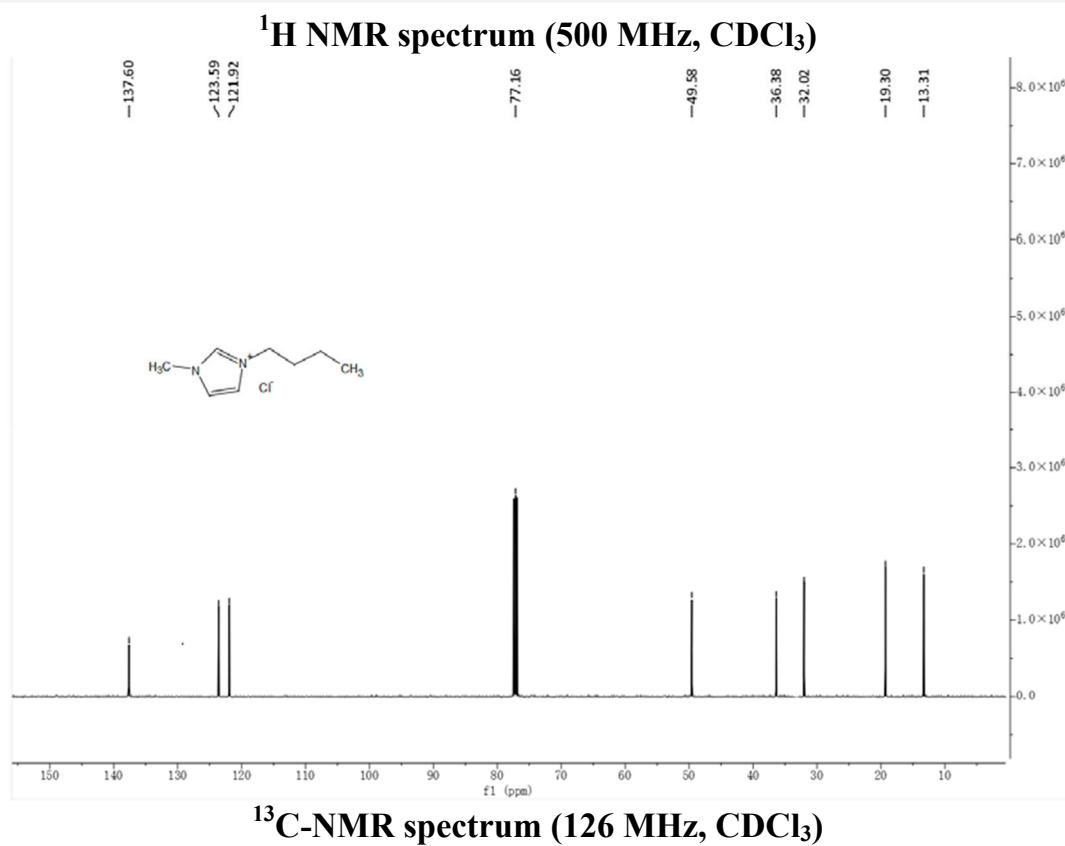

**Figure S2. NMR spectrum of the Schiff base containing imidazole ring**

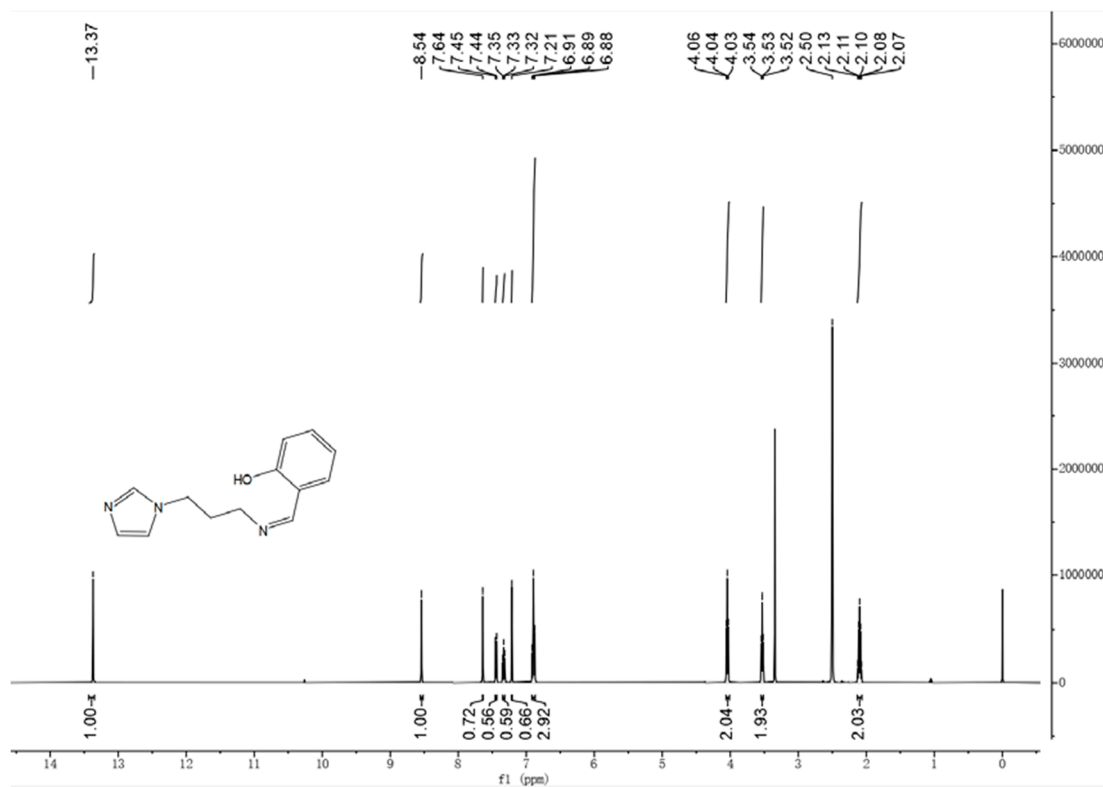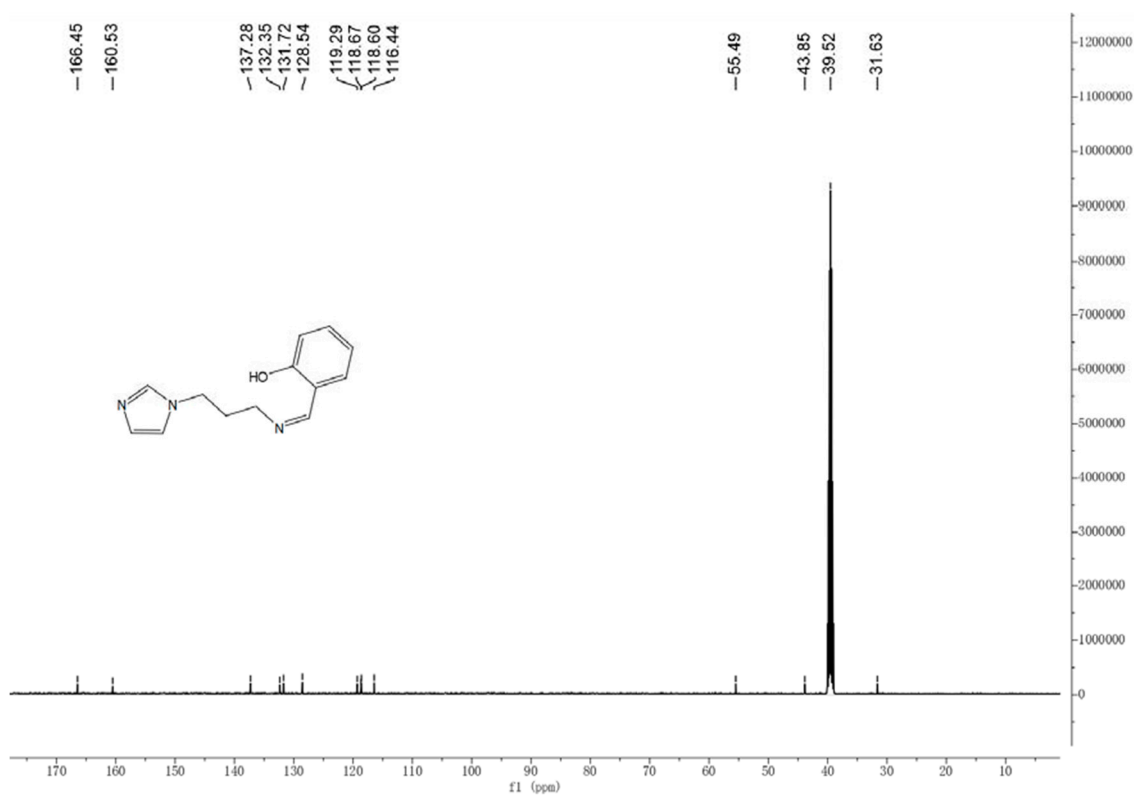

**Figure S3. NMR spectrum of the ionic liquid containing Schiff base unit**

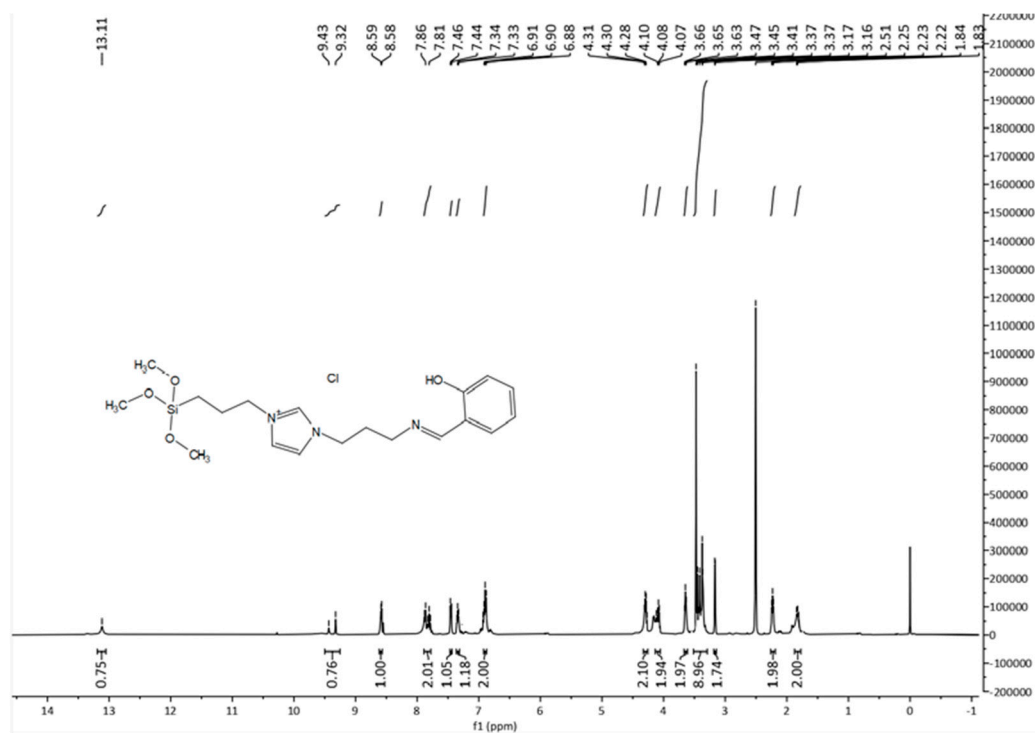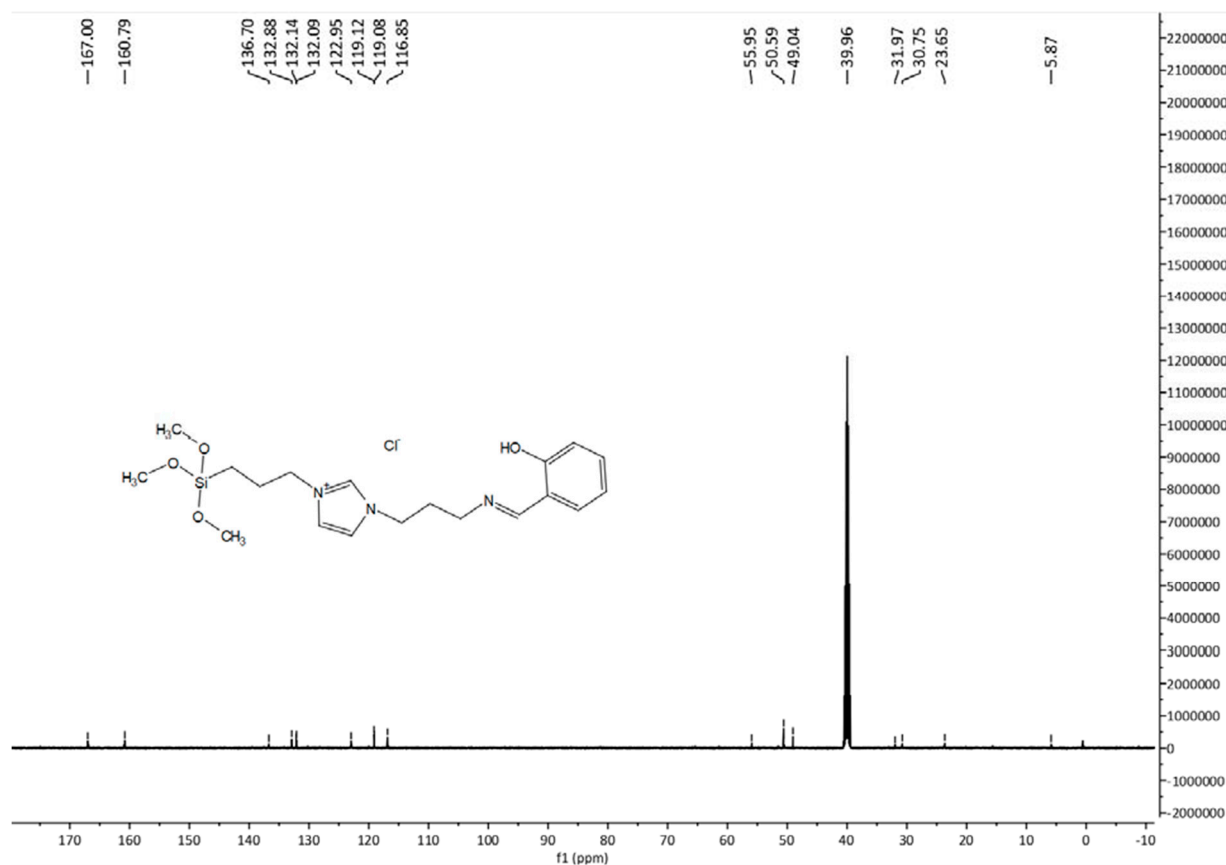

**Figure S4. NMR spectrum of a mixture of ionic liquid containing Schiff base unit and epichlorohydrin**

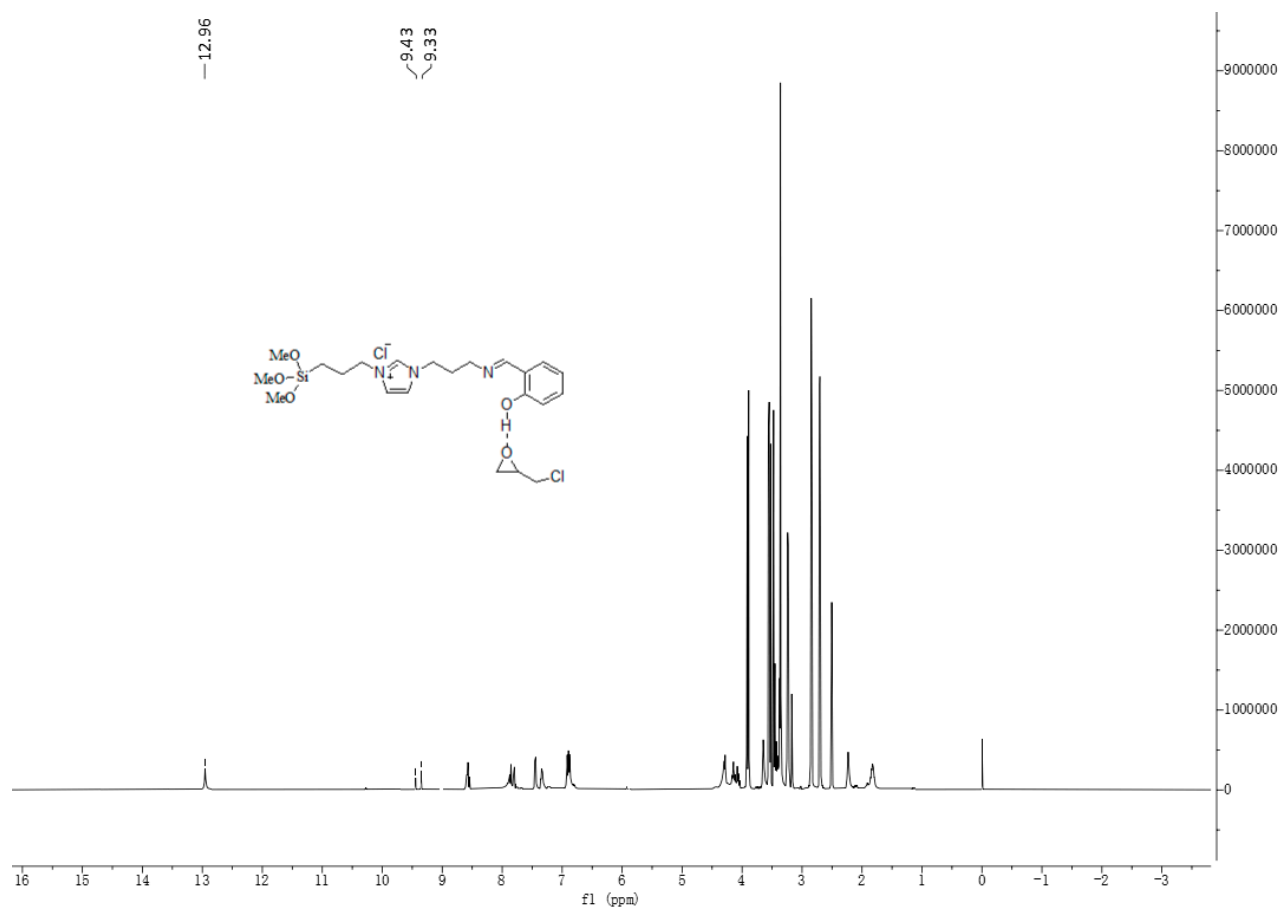

**$^1\text{H}$  NMR spectrum (500 MHz,  $\text{DMSO}-d_6$ )**

Figure S5. NMR spectrum of 4-methyl-[1,3]dioxolan-2-one

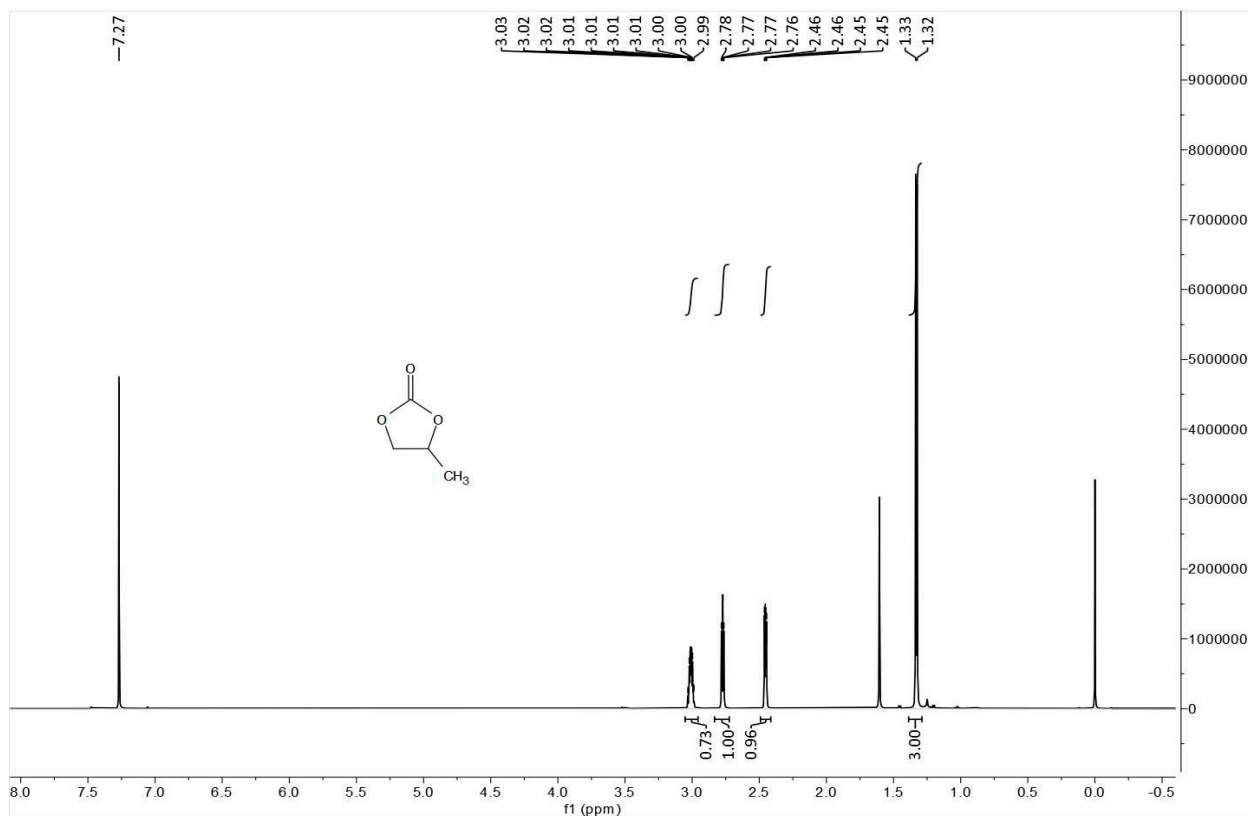

<sup>1</sup>H NMR spectrum (500 MHz, CDCl<sub>3</sub>)

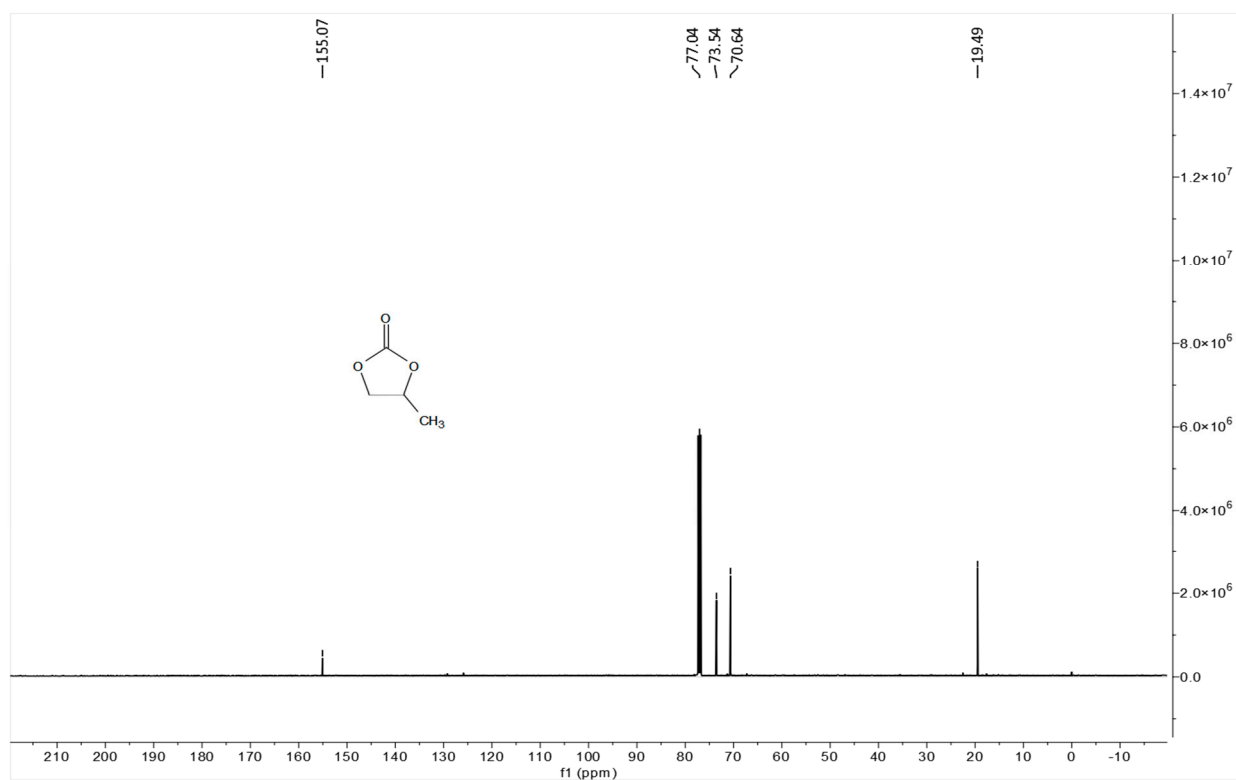

<sup>13</sup>C-NMR spectrum (126 MHz, CDCl<sub>3</sub>)

Figure S6. NMR spectrum of 4-butyl-[1,3]dioxolan-2-one

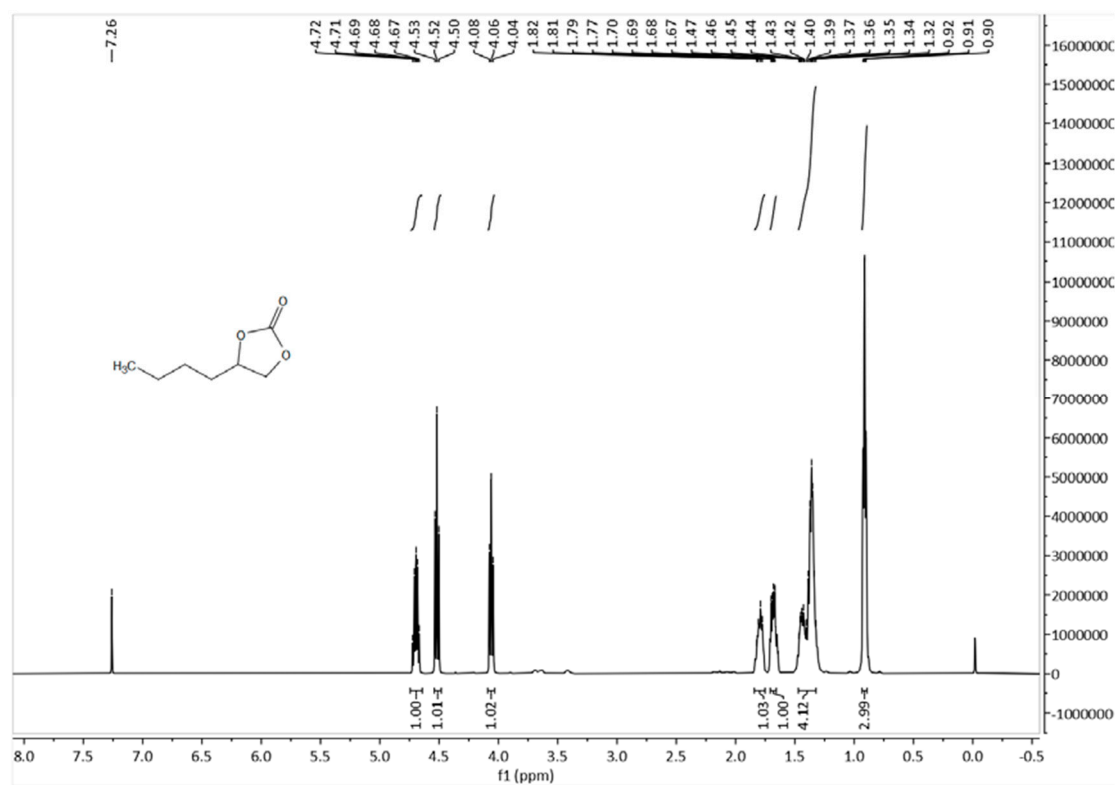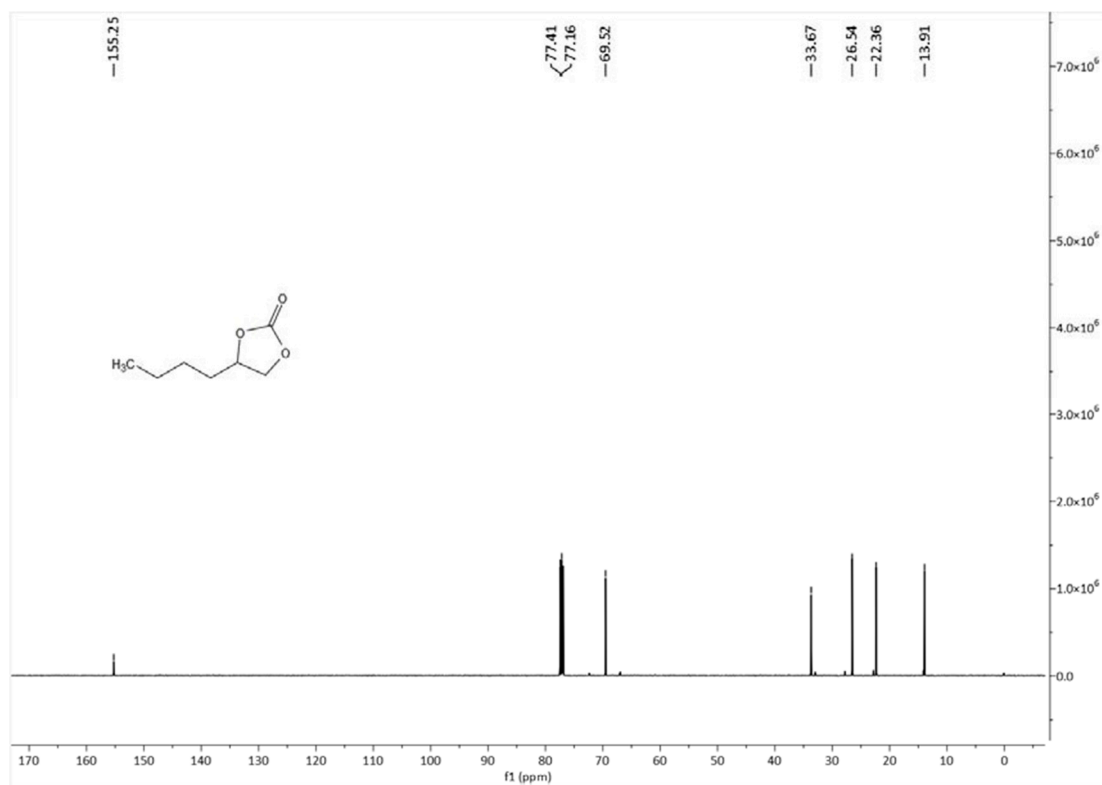

Figure S7. NMR spectrum of 4-chloromethyl-[1,3]dioxolan-2-one

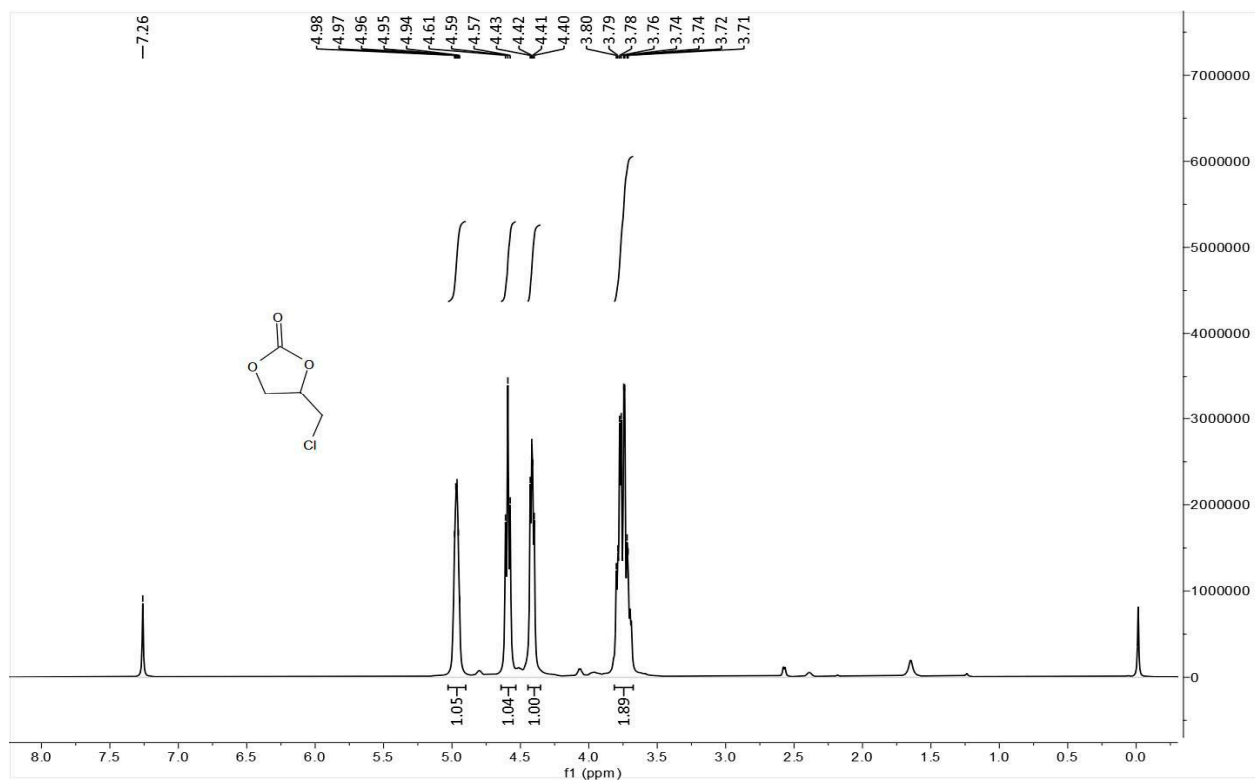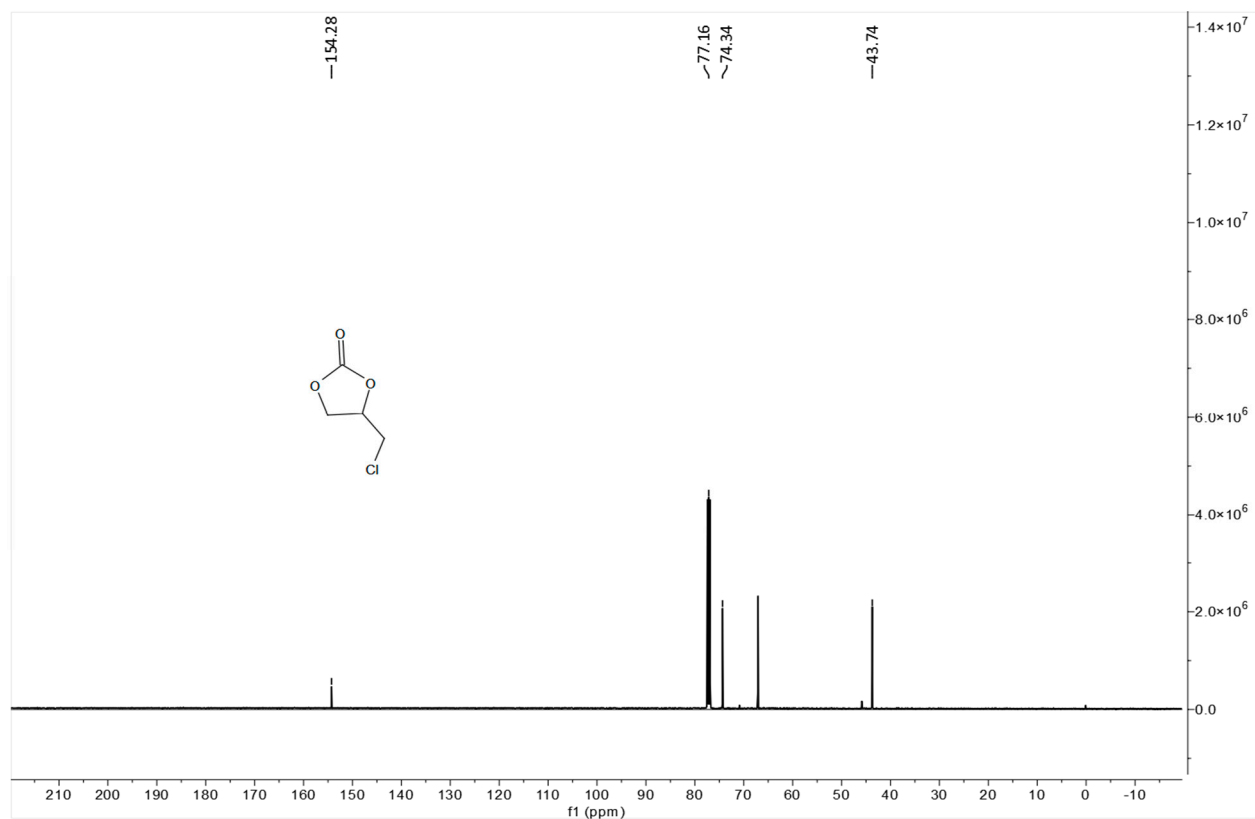



Figure S8. NMR spectrum of hexahydro-benzo[1,3]dioxol-2-one

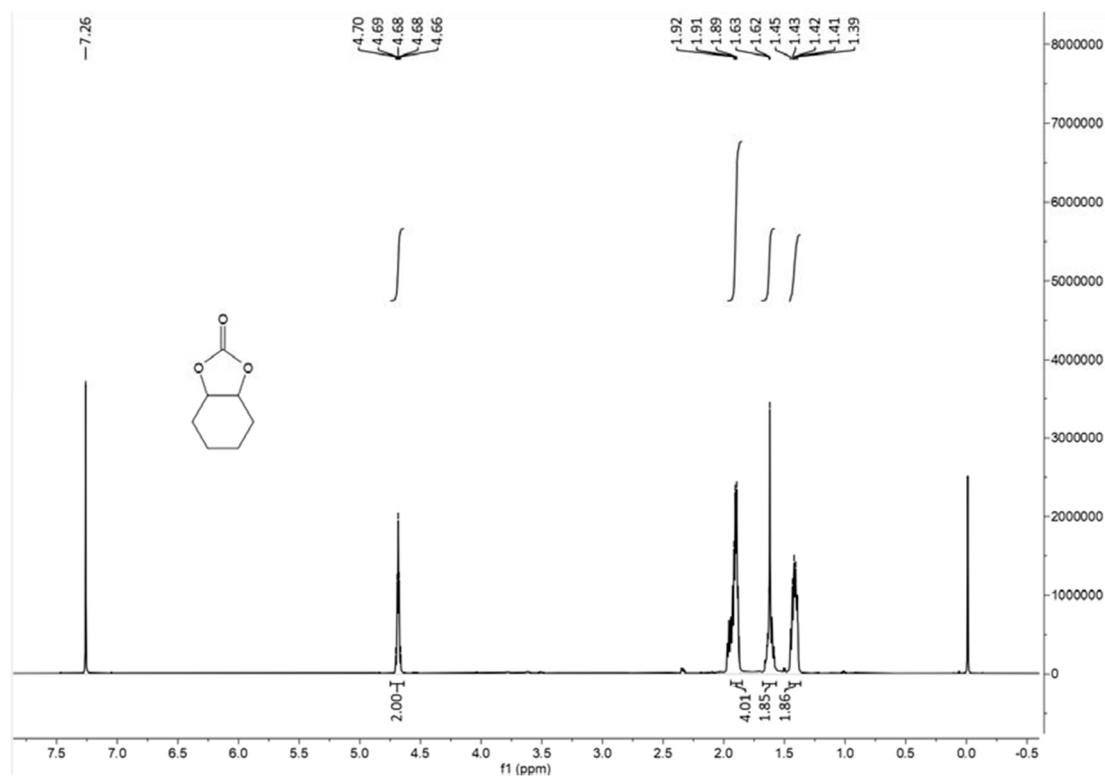

<sup>1</sup>H NMR spectrum (500 MHz, CDCl<sub>3</sub>)

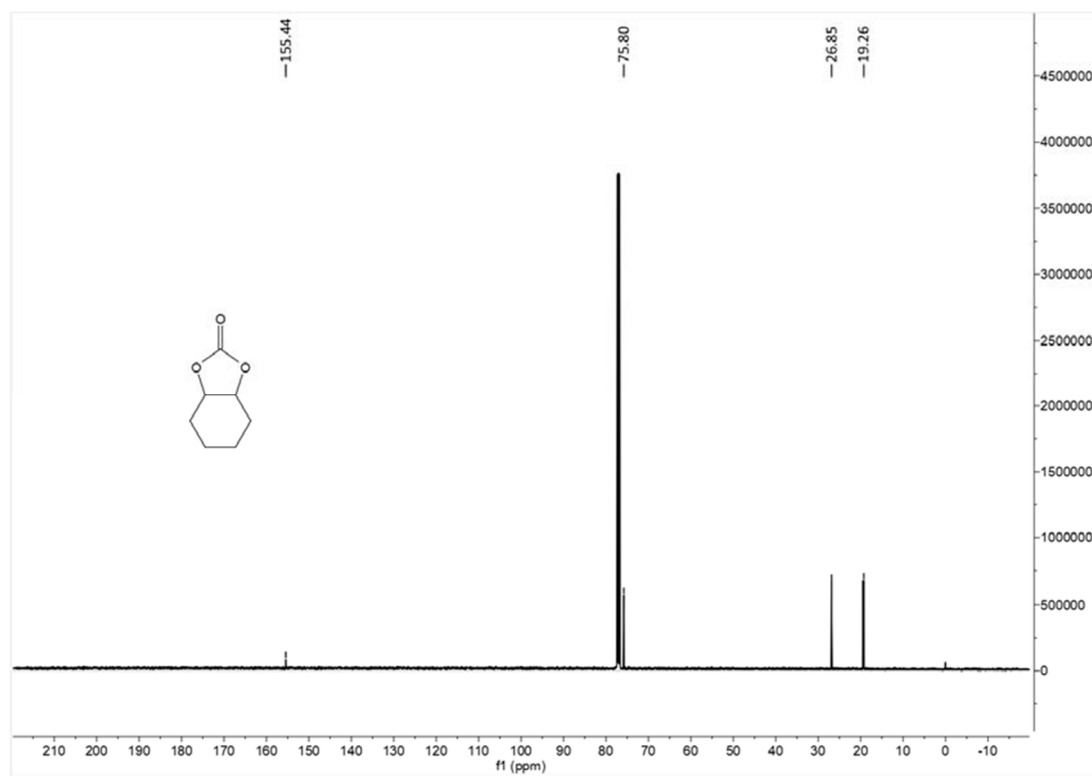

<sup>13</sup>C-NMR spectrum (126 MHz, CDCl<sub>3</sub>)

**Figure S9. NMR spectrum of 4-phenyl-[1,3]dioxolan-2-one**

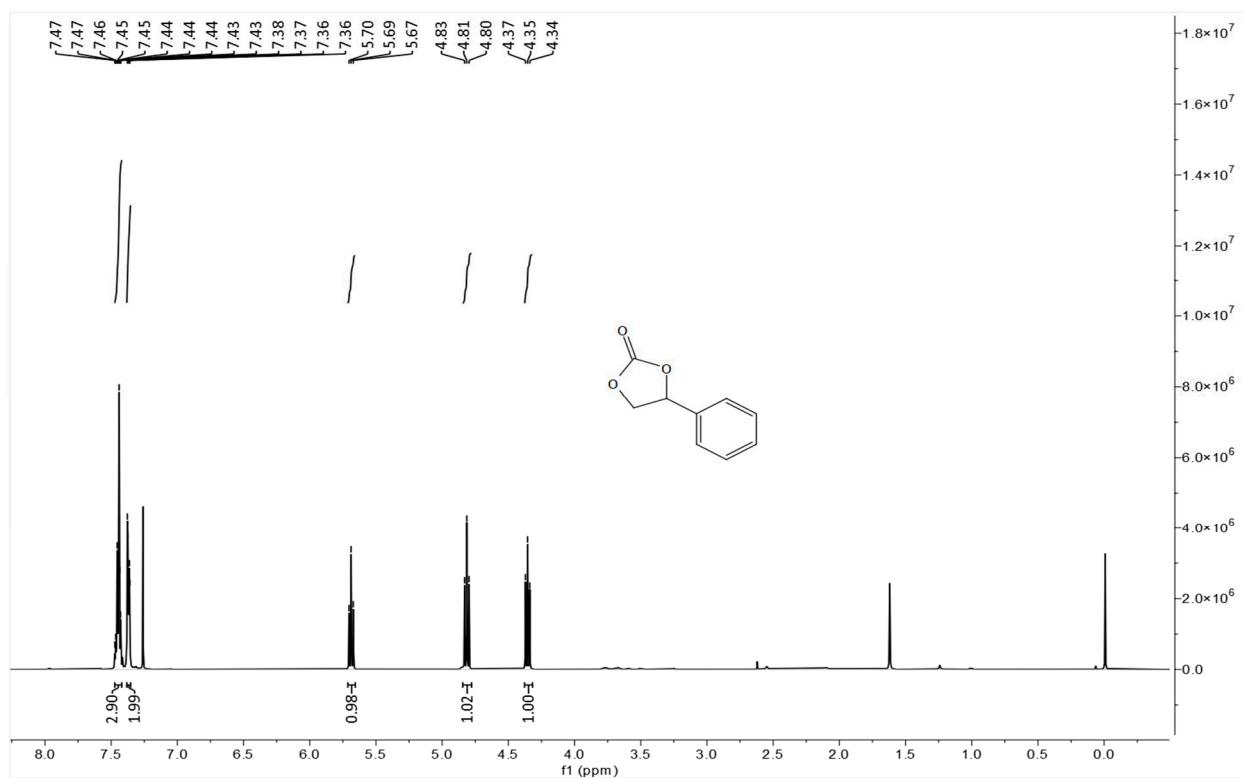

**<sup>1</sup>H NMR spectrum (500 MHz, CDCl<sub>3</sub>)**

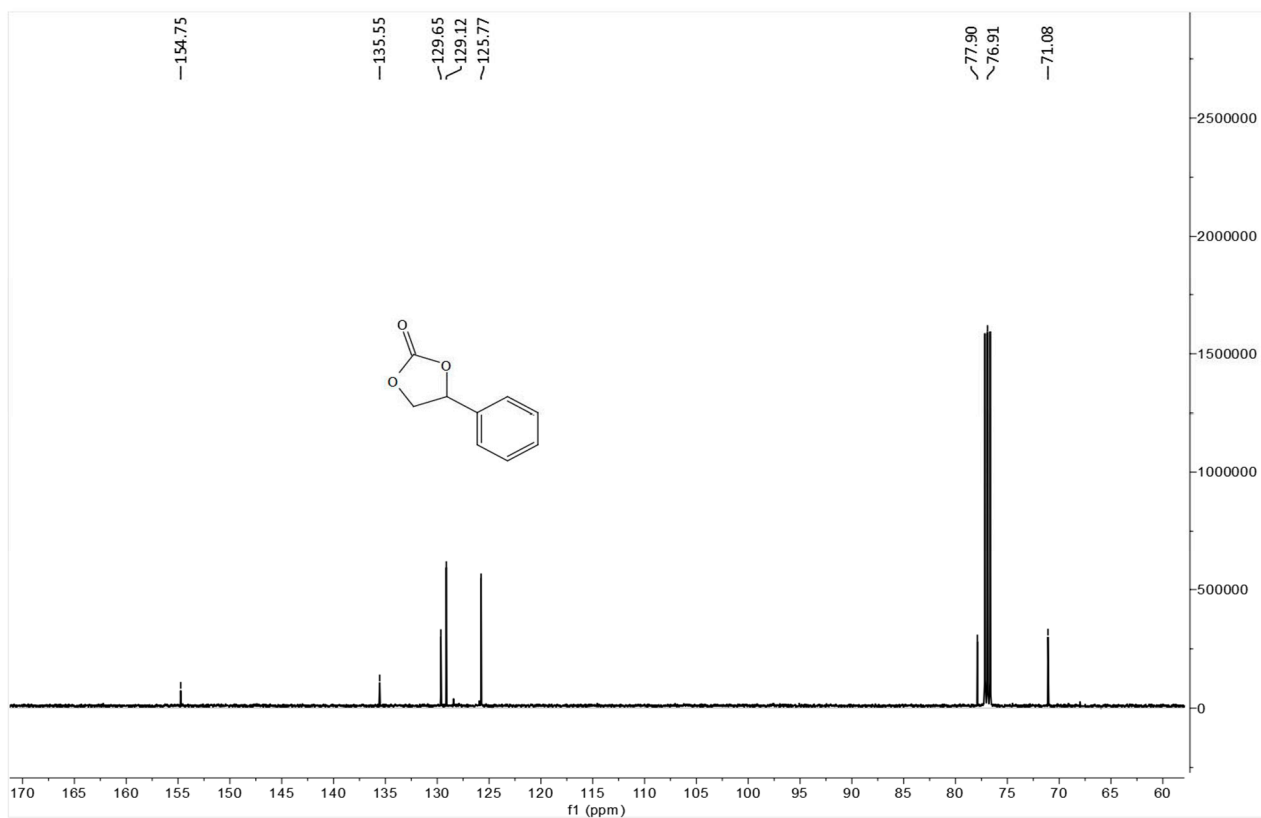

**<sup>13</sup>C-NMR spectrum (126 MHz, CDCl<sub>3</sub>)**
